# Supplementary material for: Fabrication of biochar derived from different types of feedstocks as an efficient adsorbent for soil heavy metal removal
Source: PubMed Central journal article supplement (PMC9898244; doi:10.1038/s41598-023-27638-9), 2023-02-03
Supplement: 41598_2023_27638_MOESM1_ESM.pdf [file 41598_2023_27638_MOESM1_ESM.pdf]

# Supplementary information

**Supplementary Table S1.** XRF analysis of different biochar samples.

| Element                            | Rice husk    | Sunflower husk | Wood         |
|------------------------------------|--------------|----------------|--------------|
| TiO <sub>2</sub> , %               | 0.41         | 0.37           | 0.26         |
| CaO, %                             | 5.90         | 5.22           | 26.30        |
| Al <sub>2</sub> O <sub>3</sub> , % | 5.02         | 4.16           | 7.20         |
| SiO <sub>2</sub> , %               | 47.52        | 3.77           | 8.80         |
| Fe <sub>2</sub> O <sub>3</sub> , % | 3.16         | 3.44           | 4.17         |
| P <sub>2</sub> O <sub>5</sub> , %  | 6.93         | 20.96          | 9.40         |
| K <sub>2</sub> O, %                | 0.46         | 24.33          | 3.94         |
| MgO, %                             | 3.33         | 4.20           | 3.47         |
| V, mg/kg                           | n.d.         | n.d.           | n.d.         |
| Cr, mg/kg                          | 22.55±1.15   | 24.51±1.25     | 18.04±0.92   |
| Mn, mg/kg                          | 295.13±14.46 | 301.50±14.77   | 407.66±10.18 |
| Co, mg/kg                          | 10.64±0.47   | 10.97±0.48     | 6.52±0.29    |
| Ni, mg/kg                          | 12.12±0.56   | 15.24±0.70     | 20.10±0.92   |
| Cu, mg/kg                          | 20.51±0.87   | 24.23±1.02     | 23.47±0.99   |
| Zn, mg/kg                          | 34.76±1.64   | 29.80±1.40     | 27.70±1.30   |
| Sr, mg/kg                          | 45.70±1.89   | 56.49±2.33     | 31.07±1.28   |
| Pb, mg/kg                          | n.d.         | 0.40±0.02      | n.d.         |

n.d.: not detected
